# Supplementary material for: Exploring the Efficiency of Multi-Target Editing with Single Base Editors in Haematopoietic Cell lines
Source: Research Square preprint supplement (doi:10.21203/rs.3.rs-8370034/v1), 2026-01-16
Supplement: Supplementary file 1 [file 6dadc20e3470a4ae2edafb7c.xlsx]

## Sheet: Sheet1
	Jurkat ABE Max Target	Jurkat ABE Max Endogenous	Jurkat Micro ABE Target	Jurkat Micro ABE Endogenous	K562 ABE Max Target	K562 ABE Max Endogenous	K562 Micro ABE Target	K562 Micro ABE Endogenous
FANCA_2638C>T_A5	0	0	0	0	0	0	0	0.41333
ALAS2_1231C>T_A6	0	1.93	0	2.42	0.37	0.636667	0.03	0.47
FANCC_946C>T_A6	0	0	0	0.61	0	2.65667	0	1.13333
FANCC_958C>T_A6	0	0	0	1.43667	0.02	3.81667	0	0
IL2RG_430C>T_A6	0	0	0	0.203333	0	1.11667	0	0.183
FANCC_946C>T_A7	0	0	0.03	0.25	0	1.17667	0	0.343333
FANCC_958C>T_A7	0	0	0	0.686667	0.08	2.39333	0	1.29333
GATA2_1009C>T_A7	0	0.86	0.06	0.186667	0.06	0	0.07	0
GATA2_1187G>A_A7	0	1.7	0	2.01667	0	5.58333	0	6.17
FANCC_946C>T_A8	0	0	0	0	0	0.993333	0.1	0.513333
FANCC_958C>T_A8	0	1.55	0.03	2.75333	0	3.71667	0.04	2.45
ALAS2_1231C>T_A9	0	1.26	0.03	1.57333	0.15	2.06333	0	4.55667
FANCC_946C>T_A10	0	0	0.1	0	0.16	0.053333	0.15	1.18667
GATA2_1009C>T_A10	0	0	0	0	0.09	0	0.02	0
FANCC_958C>T_A11	0	2.28	0.09	0	0.08	2.09333	0	0
GATA2_1187G>A_A11	0	1.3	0	2.07333	0	2.65333	0.09	2.75333
GATA2_1187G>A_A13	0	0	0	0.67	0	0.88	0	0.84
ALAS2_1231C>T_A14	3.38	6.37	0.09	2.87333	2.85	1.81	0.16	1.61
FANCC_946C>T_A15	0	12.2	0	1.57	0.08	4.15333	0.05	2.68667
FANCC_946C>T_A16	0	0	0	0	0.08	0.916667	0	0
GATA2_988C>T_A16	0	0	0	0	0	0	0	0
ALAS2_1231C>T_A17	0	0.52	0.03	0.596667	0	2.51	0.03	2.54
FLNA_1034G>A_A17	0	0	0	1.97	0	3.81667	0	2.3
