# Supplementary material for: Exploring the Efficiency of Multi-Target Editing with Single Base Editors in Haematopoietic Cell lines
Source: Research Square preprint supplement (doi:10.21203/rs.3.rs-8370034/v1), 2026-01-16
Supplement: Supplementary file 2 [file 76e9dc099ca175dda22cf6f2.xlsx]

## Sheet: Tables1-3 Combined
Variant Name	sgRNA Sequence (sense strand)	Jurkat ABE Max On-Target	Jurkat ABE Max Bystander	Jurkat Micro ABE On-Target	Jurkat Micro ABE Bystander	K562 Max Target Edit	K562 Max Bystander Edit	K562 Micro Target Edit	K562 Micro Bystander Edit
ACTN1_137G>A	CCACCTCCAGAAGGCGGGGAC	0	0	0	0.15	0	0	0	0.08
ADA_385G>A	CACCCCAGACGAGATGGTGGC	0	0	0	0.08	0	0	0	0.09
ADA_646G>A	CGCCAGGGAGGTGGGCTCGGC	0	0	0.03	0.04	0	0.03	0.04	0.07
ADA_736C>T	GTTATAAAGGGCCTAGTCTTC	0	0	0.03	0	0.02	0.1	0.02	0.03
ADAMTS13_1193G>A	CCTTGCTCCCACTCCTGCGGA	0	0	0.06	0	0.06	0	0.1	0
ADAMTS13_1345C>T	CTATTGCGACATGAACTCCAG	0	0	0	0.28	0	0	0	0.38
ADAMTS13_1584p52G>A	GGGTAGACGTGTGTGGACATT	0	0	0.08	0.04	0	0	0	0
ADAMTS13_304C>T	GCACATAGCACTCTGTGTCCT	0	0	0.05	0	0	0.05	0	0.09
ADAMTS13_587C>T	GCTGGATGACGCCCCGCACCT	0	0	0	0	0	0	0	0
ADAMTS3_280C>T	AGTCACAGATGAAAATCTTTT	0	0	0	0.15	0	0.23	0	0
ADAR_1630C>T	TCTCAGCCATTGATGACAACC	0	0	0	0	0	0	0	0.16
AK1_118G>A	ACCTCTCCACCAGGGACCTCC	0	0	0	0.12	0	0	0	0
AK1_190G>A	GGAGAAGAGGCAGCTGGTTCC	0	0	0	0.11	0	0	0	0
AK1_382C>T	ACGTTTCAAGAGCCACTGGGT	0	0	0.08	0.09	0.1	0.04	0.07	0.09
ALAS2_1231C>T	CATAGGAGCACACCATGTCCA	5.67	3.38	0.03	0.15	7.71	2.9	0.1	0.22
ALAS2_1642C>T	ATCCTAGAGGGGCAGCCCCAC	0	0	0	0.09	0.09	0	0	0.12
ALAS2_871G>A	TCCATGATCCAAAGTATCCGT	0	0	0	0.11	0	28.91	0	0.08
ATRX_6003G>A	GACTGATACAAAGATTTTGTT	0	0	0	0	0	0.75	0	0.57
ATRX_659G>A	AATGGATGAACAATATAGGTA	0	0	0	0.12	0	0.14	0	0
BRCA1_1115G>A	GAAGATGTTCCTTAGATAACA	0	0	0	0
BRCA1_3598C>T	GTAACCCTAAGCCAAATGTGT	0	0	0	0.21	0.09	0.72	0.05	0.26
BRCA1_4327C>T	TTCACAGGTCCTCAAGGGCAG	0	0.3	0.03	0.03	0	0.02	0.05	0.04
BRCA1_4524G>A	TTAGATGATAGGTGATACATG	0	11.63	0.56	0	0	0	0	0
BRCA1_5194m12G>A	GTTGTGTTTAGTTTCTTTCAG	0	0	0	0	0	0	0	0
BRCA1_5251C>T	ATTCTCTTGCTCACTTTGGAC	0	0	0.11	0	0.08	0.32	0	0
BRCA1_5444G>A	CAGCCAGATGCCTAGACAGAG
BRCA2_5791C>T	ATGTTATAAAATTTCTTCACT
BRCA2_9117G>A	CTACCAGTACAAACCTTTCAT	0	0	0	0.87	0	0	0	0.79
BRCA2_9196C>T	GATGGCTAAAAGTCTGGATCT
BRCA2_9382C>T	TCACCACTGGAGGTTGCTTGC	0	0	0	0	0.75	0	0	0.42
BRIP1_1162C>T	TGACAACCTATTCTTTCAGAT					0	0.2	0	0
BRIP1_1315C>T	AGCACACAGCTCATAGGGGTT	0	0	0	0.36	0	0	0	0
BRIP1_1495C>T	CCTCTTTTTAAAGAACAGCAG
BRIP1_1618C>T	ACCTGCTATTTTACCTAAAAA	0	0	0	0
BRIP1_1993C>T	CAGTATTCTAGAAGGTAGCAC	0	0	0	0	0	35.7	0	0
BRIP1_2479C>T	CTAGTTTAAGGCCCTGTATGC
BRIP1_2517G>A	AAATGATTGAGGAGCTCTTAT	0	0	0	0	0	0	0	0
BRIP1_2589G>A	ACTTTCTAAATGAGTACGGCA	0	0	0.13	0	0	0	0	0.41
CSF3R_922C>T	CCAGCGGATGCAGCATATCTG	0	0	0	0.75	0.92	3.11	0	0.21
CTC1_3049C>T	GACCACCCTACAGAAGTTCAG	0	0	0	0.13	0.09	1.05	0	0
CTC1_322C>T	TCTCAGGGCAGGGGGTTCCCA	0	0	0	0	0	0.05	0.06	0
CXCR4_1000C>T	TCCACCTCACTTTCCTTTGGA	0	0	0	0	0.08	0.3	0.05	0.24
DKC1_1058C>T	GTAGAGATGACCACTGTGGTC	0	0	0	0
DKC1_146C>T	GACATGTCCAACTTAGCAACT	0	0	0	0	0.16	0.32	0	0
DNAJC21_544C>T	TTTCCATGGCTCATTTTTCCC	0	0	0	0
ELANE_182C>T	GCACAATCAGGGTGGCGCCGC	9.07	0	0.18	0.14	0.11	0	0	0
ELANE_214G>A	CGCGCACTGCATGGCGAATGT	0	0	0.58	0.08	19.75	0.05	1.98	0.13
ELANE_597p1G>A	GGCGTCTGTTTCATACGTGCC	0	0	0.03	0.05	0	0.04	0.03	0
ERCC6L2_1963C>T	CTTGTATATCTGTCATAAATA	0	0	0	0
FANCA_1027C>T	TCTCTCTACATCTGAACAGCA	0	1.03	0	0.04	0.07	0.13	0	0
FANCA_154C>T	TGGCTTCACAGGAGGCGCACA	0	0	0.04	0.15	0.12	0.12	0.06	0.25
FANCA_1827m1G>A	TTTCCTGTGATCCAAAGCAGA	0	0	0	0
FANCA_2638C>T	AGAGGCTGTCAGGCCTCTGAG	0	0	2.96	0	2.79	0	6.05	0
FANCA_2641C>T	AGAGGCTATCGGGCCTCTGAG	0	0	7.81	0	0.57	0.07	0.66	0
FANCA_513G>A	CAAGAATTATGAAAAATACAG
FANCA_790C>T	CTACGGCATTTTTTCAGGCTC	0	0	0.18	0
FANCB_1496+5G>A	GAAGCTGTAAATAAATTCCAA
FANCC_339G>A	TTAACTCCTGAATACAGGTAA
FANCC_897m1G>A	TTCAAGTGTGCACTCCTGGAA	0	0	0	0	0	0	0	0
FANCC_946C>T	CGTAAACACCTAAATAGTGGC	0	0	17.56	0.13	0.88	0.32	3.93	0.15
FANCC_958C>T	TACAAAGCACTACGTAAACAC	3.38	0	7.47	0.12	12.19	0.18	0.42	0.04
FANCD2_2444G>A	TCACTCAGTTAAAGCACATTG	0	0	0	0	0	0.75	0	0.14
FANCD2_2715p1G>A	GCCAGCTAAACAAGATATTGG	0	0	0.04	0.32	0	0.4	0	0.16
FANCD2_757C>T	TCAGAGGCTTGAAAGGACATC	0	0	0	0	0.09	0.18	0	0
FANCD2_958C>T	TTTACTTAGGAAGCCTGTAAC	0	0	0	0.43
FANCF_16C>T	GGTGCTACAGAAGGGATTCCA	0	0	0	0.04	0	0	0.1	0
FANCG_1066C>T	CCCGTCTATAGGCACCTGCTT	0	0	0.03	0.13	0	0.25	0.06	0.18
FANCG_652C>T	ATCAGCTCCTAGAGACCTGAG	0	0	0	0.17	1.1	0.27	0	0.18
FANCI_3674G>A	GCTCAGCACCTCACAAGACTT	0	0	0.07	0.15	0	0.09	0	0.08
FANCI_507G>A	TACCAGGTGAGATCAGCAATA	0	0	0	0.18	0	0	0	0.11
FANCL_211C>T	GACTTACCTGTTATACTATTC	0	0	0	0	0	0	0	0
FANCM_1432C>T	TCAGGTCTCATCACGTTTCTT
FANCM_1591C>T	TCACGAAACTATTTCACTACC
FANCM_1777C>T	ACGTTCCTCTCATCCTTCAGA	0	0	0	0	0	0	0	0
FANCM_1798C>T	TCTAATTATAAATCTGTAAAA
FANCM_1879C>T	CAGGAACCATTCATGGACTTC	0	0	0	0
FANCM_3832C>T	GTATTAGTGCTTAATTCGAAA
FLNA_1034G>A	CTTCTCCGTCTAGTACGTCCC	2.79	0	0.07	0	5.32	0	0	0
FLNA_3668C>T	CCCGGGGCAGAGGAGAATGTA	0	0	0	0.08	0	0	0.02	0.06
G6PC3_130C>T	CGCGGAGAAGTAGAACAGAAA	0	0	0	0	0	0	0	0
GATA1_646C>T	TGTCCTGTCCCTCCACCACAG	0	0	0.02	0	0	0	0	0
GATA2_1009C>T	TCCTACCAGTCTTCACTTGGG	13.58	0	0.48	0.06	4.22	0.15	2.77	0.09
GATA2_1017p572C>T	CAGAGTCCAGAAACAGATACA	0	0	0	0.57	0	0.54	0	0.12
GATA2_1061C>T	TGTCATCTGACAATTTGCACA	0	0.7	0.05	0.03	0.06	0.07	0	0.12
GATA2_1187G>A	AGGGATCCAGACTCAGAACCG	0	0	26.22	0	1.7	0	6.86	0.09
GATA2_1192C>T	GGACATCTTCCAGTTCCGAGT	0	0	0.4	0.1	0.45	0.13	3.68	0.11
GATA2_761C>T	GGGCAGCCGCCAGCACATAGG	0	0	0.24	0.14	1.13	0.1	0	0.24
GATA2_988C>T	GTCAGTTCTGCCCATTCATCT	0.52	0	6.62	0	2.48	0	6.98	0
HAX1_256C>T	CTCATACTAGGTCATCAAAGC	0	0	0	0
IL2RG_270G>A	TTCTCCTCTAGATACAAGAAC	0	0	0	0.14	0	0	0	0
IL2RG_341G>A	TGACTGTCAGTTGCAAAAAAA	0	0	0	0	0	0	0.48	0.24
IL2RG_421C>T	TGGCCTATCTCCTGGGTTCCC	0	0	16.33	0	2.91	0	15.41	0
IL2RG_430C>T	AGCATCTATGTGGCCTGTCTC	4.22	0	1.32	0	12.83	0	6.22	0
IL2RG_454p1G>A	AATCTGGATAATTTGGAAAGA	5.84	0	0	0.09	0.15	0	0.23	0.11
IL2RG_562C>T	GGTACTACACCAAGTGCTCCA	0	4.01	0.02	0.2	7.6	20.25	0	0.26
IL2RG_677G>A	AGCCACTTTAACCCACTCTGT	0	0	0	0.54	0	4.11	0.07	0.26
JAGN1_130C>T	CAGATATACGTAGATCAGCTT	0	0	0	0.23	0	0.19	0	0
JAK3_1333C>T	TCAGCTGAGGCCAACCAGAAG	0	0.75	0.06	0.14	0.04	2.3	0.05	0.22
LIG4_1406G>A	TTGTTGGAGAATATTGGGGTA					0	0	0	0
LIG4_1738C>T	CTTTTCAATTCATGGAAAACG	0	0	0	0	0	0	0	0.09
LIG4_833G>A	GGTGAACATATGCAAATGCAC	0	0	0	0
MPL_1194G>A	AACTTGCACTGAAGGGAGATC	0	0	0	0.03	2	2.05	0.07	0.14
MPL_1904C>T	GAGCCTGTCCTCAAAGCTGCT	0	0	0	0.14	0.05	0	0	0
MPL_304C>T	GAAAGAAGAGACACACTTCCT	0	0	0	0	0	0	0	0
MPL_556C>T	AATCAGCTATATGACCGTGGG	0	0	0.06	0.06	0	22.98	0.22	0
MPL_769C>T	CAGGTTCGCTGCACAGCTGCA	0	0	0	0.07	0	0	0	0
MTHFD1_727p1G>A	GTCCCAGATGAGTGTTGTTGG	21.11	0.38	0	0.12	0	0.04	0	0.05
MYH9_2114G>A	CTGCCACCAGGGCTTCCCCAA	0	0	0.04	0.33	0	0	0	0.06
MYH9_3493C>T	CTCACATTTTGACCTGGACAG	0	0	0.02	0	0	0.3	0	0.2
MYH9_5521G>A	CGTCGGACCAAGAAGAAGCTG	0	0	0	0	0	0.48	0	0.18
MYH9_5797C>T	TTCAGCGGGGCACGACAAACG	9.95	0	0	0.22	0	8.18	0	0.04
NBEAL2_1721G>A	GCCTAGCTCTGTCTGCACCCT	0	0	0	0	0.02	0	0	0
NHEJ1_532C>T	CTTCAATCAATCTGTAATAAG	0	0	0	0
NOP10_100C>T	GAACCAAGCAGGATGGGCTGA	0	0	0	0.08	0.1	0.3	0	0.2
PALB2_106C>T	GATTCACTTACCTAAAGGCGG	0	0	0	0.21
PALB2_1240C>T	ACATGCTTCATGTTGTTCTAA	0	0	0	0	0	0.05	0	0
PALB2_2962C>T	GACTTCTACTTATTGATCAGA	0	0	0.02	0.19	1.67	1.8	0	0
PARN_1045C>T	AACCACTTTTCCAATTCCGCA	0	0	0	0.8	5.65	0	0.14	0.14
PARN_1148C>T	TAGACATCGTAGCCTGCCTCG	24.23	0	0.06	0.06	0	0.15	0	0.17
PARN_529C>T	AATAAACTTCTTTTAATCCTC	0	0	0	0.12
RAB27A_352C>T	GCATGCATCTATAGCTGGCCT
RAB27A_550C>T	ACCGTTCCATTCACTTCATTA					0.08	0.02	0	0.05
RAD51C_397C>T	CATAATTATGTTTTTCCAACA
RAD51C_709C>T	CTAGTCAAACCTAAATACAGA
RAD51C_802C>T	ATCATTTACTGGGCTAGGCCA	0	0	0	0
RAD51C_955C>T	CCTTTGCTTTCAGTCCCAATG					0	0	0	0
RBM8A_M21G>A	AGACAAGATCTCGATCGAAGG	0	0	0	0.04	0.04	0	0	0
RPL11_158m1G>A	TTCCTGCAACTAGATACACTG	0	0	0.07	0.14	0.1	0.06	0	0.13
RPL11_223C>T	CCCTCAAACTGTGCAGTGGAC	0	0	0	0	0	0	0	0
RPL27_m2m1G>A	CCTTGCTCTCTGCAAAAATGG	0.23	2.63	0	0.03	0	3.38	0	0.06
RPL35A_304C>T	ACTCACCACTCAGATTCTGTG	0	0	0	0	0	0	0	0
RPL35A_97G>A	AAAATTGAAGGTATTTACGCC	0	0	0	0
RPL5_67C>T	CTCGTCATCTTCTAAATTTCA					0	0	0	0
RPL5_70C>T	GTGACAGTACCTCATCGTCTT	0	0	0	0
