# Supplementary material for: Exploring the Efficiency of Multi-Target Editing with Single Base Editors in Haematopoietic Cell lines
Source: Research Square preprint supplement (doi:10.21203/rs.3.rs-8370034/v1), 2026-01-16
Supplement: Supplementary file 3 [file a66795775cfc28bf695f5c30.xlsx]

## Sheet: Sheet1
	Primer Name	Primer Sequence (5’ - 3’)
Exogenous Editing	MiSeq_FWD_oligoPool_1	TCGTCGGCAGCGTCAGATGTGTATAAGAGACAGCTTGTGGAAAGGACGAAACACCG
	Miseq_LentiCRISPRv2_oligopool_Rev	GTCTCGTGGGCTCGGAGATGTGTATAAGAGACAGtcaagacctagctagcgaattc
Endogenous Editing	ALAS2-Seq-Fwd	CATGATCCTGTTGCTCTGG
	ALAS2-Seq-Rev	GCATGTGCTTGACATTGC
	FANCC-Seq-Fwd	GTTGAGATACTGCTGAAGC
	FANCC-Seq-Rev	GTTGGGGCACTCATTAGG
	FLNA-Seq-Fwd	TTCACTGTGGAGACCAGAAGTGC
	FLNA-Seq-Rev	ACTTATCCACGTACACCTCGAAGG
	GATA2_1_Seq_Fwd	TGGAAGAGGAGAAAAGTTGG
	GATA2_1_Seq_Rev	CCAGAAAGAGAGACGACC
	GATA2_2_Seq_Fwd	TTCCTGGAATGGTAGCCATCTGG
	GATA2_2_Seq_Fwd	AATGCTGGGCTGCTAAGGGTTTGG
	IL2RG-Seq-Fwd	GGGTAAGTCATAAGTCGG
	IL2RG-Seq-Rev	ATATGTGGTCATTCCCCTGG
	FANCA-202_Fwd	AGCCACTCACAGTGAAACTTGC
	FANCA-202_Rev	GGTCACCTACGTGAACATCTTCC
